# Supplementary material for: Dynamic prediction of repeated events data based on landmarking model: application to colorectal liver metastases data
Source: Springer Nature journal article supplement (doi:10.1186/s12874-019-0677-0), 2019-02-14

**Table S1. Predict 3-year risks of recurrence regarding death as censoring.**

**(a) Parameter estimates in landmarking supermodel using dynamic pseudo observations (DPOs)**

|                                           | DPOs based on AJ estimator (eq(6)) |      |                 |      | DPOs based on KM estimator (eq(7)) |      |                 |      |
|-------------------------------------------|------------------------------------|------|-----------------|------|------------------------------------|------|-----------------|------|
|                                           | 1 time                             |      | 2 or more times |      | 1 time                             |      | 2 or more times |      |
|                                           | $\beta$                            | se.  | $\beta$         | se.  | $\beta$                            | se.  | $\beta$         | se.  |
| intercept                                 | -1.22                              | 1.99 | 1.30            | 4.27 | -1.06                              | 1.97 | -0.13           | 4.23 |
| time (year)                               |                                    |      |                 |      |                                    |      |                 |      |
| $s$                                       | 2.19                               | 3.28 | -6.24           | 6.28 | 1.92                               | 3.24 | -3.98           | 6.15 |
| $s^2$                                     | -1.53                              | 1.64 | 2.42            | 2.69 | -1.41                              | 1.62 | 1.38            | 2.61 |
| $s^3$                                     | 0.22                               | 0.24 | -0.32           | 0.34 | 0.21                               | 0.24 | -0.19           | 0.33 |
| the number of recurrences (1 or more / 0) |                                    |      |                 |      |                                    |      |                 |      |
| intercept                                 | 1.92                               | 2.12 | 0.49            | 4.72 | 1.84                               | 2.09 | 1.51            | 4.54 |
| $s$                                       | -2.87                              | 3.26 | 3.36            | 7.01 | -2.70                              | 3.21 | 1.78            | 6.73 |
| $s^2$                                     | 1.65                               | 1.55 | -2.26           | 2.99 | 1.58                               | 1.53 | -1.55           | 2.87 |
| $s^3$                                     | -0.24                              | 0.22 | 0.38            | 0.38 | -0.23                              | 0.22 | 0.29            | 0.37 |
| multiple tumors / single tumor            |                                    |      |                 |      |                                    |      |                 |      |
| intercept                                 | 4.46                               | 2.09 | -2.27           | 4.32 | 4.31                               | 2.05 | -1.30           | 4.44 |
| $s$                                       | -7.87                              | 3.21 | 3.16            | 6.64 | -7.57                              | 3.15 | 1.38            | 6.77 |
| $s^2$                                     | 3.86                               | 1.50 | -0.91           | 2.89 | 3.71                               | 1.48 | 0.01            | 2.91 |
| $s^3$                                     | -0.53                              | 0.21 | 0.09            | 0.37 | -0.51                              | 0.21 | -0.04           | 0.36 |
| the length of tumor (>2cm / ≤2cm)         |                                    |      |                 |      |                                    |      |                 |      |
| intercept                                 | -0.10                              | 1.87 | -1.19           | 4.07 | -0.09                              | 1.89 | -0.66           | 4.00 |
| $s$                                       | 0.31                               | 2.88 | 4.08            | 6.21 | 0.30                               | 2.91 | 3.29            | 6.04 |
| $s^2$                                     | -0.21                              | 1.34 | -2.05           | 2.70 | -0.19                              | 1.37 | -1.74           | 2.58 |
| $s^3$                                     | 0.03                               | 0.19 | 0.29            | 0.35 | 0.02                               | 0.20 | 0.26            | 0.33 |

$\beta$ : parameter estimates; se.: robust standard error;  $s$ :smoothers in the super model.

**(b) Predicted 3-year risks of recurrence**

Stacked graphs are drawn the predicted risks of no recurrence for 3years after landmark time (blue), 1 time recurrence (yellow) and 2 or more times recurrence (orange). Circle and error bars show point estimates and 95% CI, respectively, by fixed landmark regression model. Filled areas show point estimates by supermodel. The left side figures show the results from DPOs based on AJ estimator and the right side figures show the results from DPOs based on KM estimator.

**No recurrence before landmark time, single tumor not greater than 2cm**

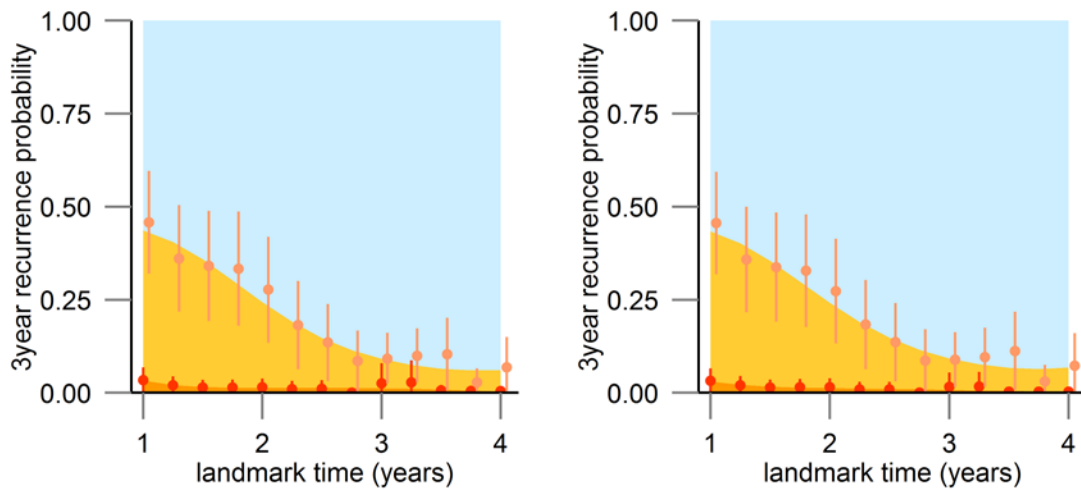

**No recurrence before landmark time, single tumor over 2cm**

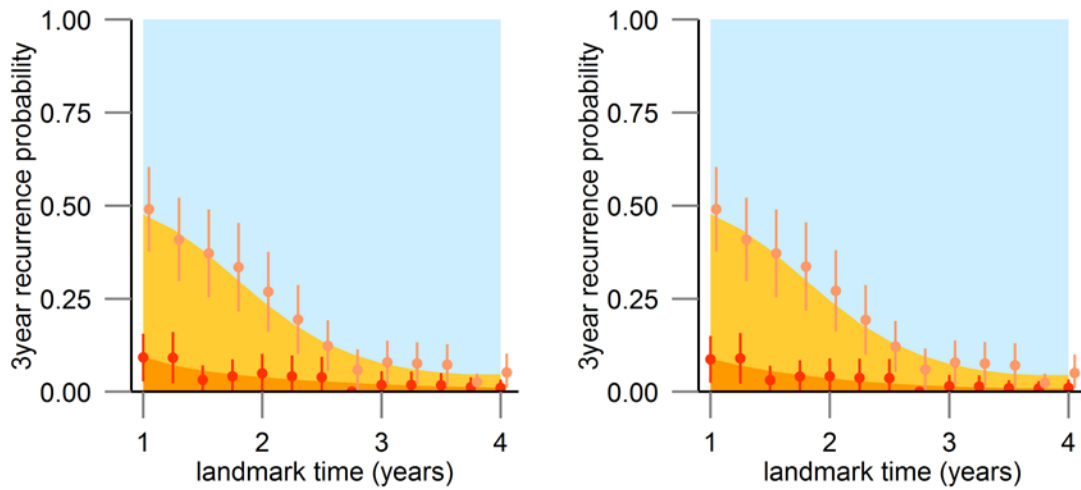

**Recurrence occurred before landmark time, single tumor not greater than 2cm**

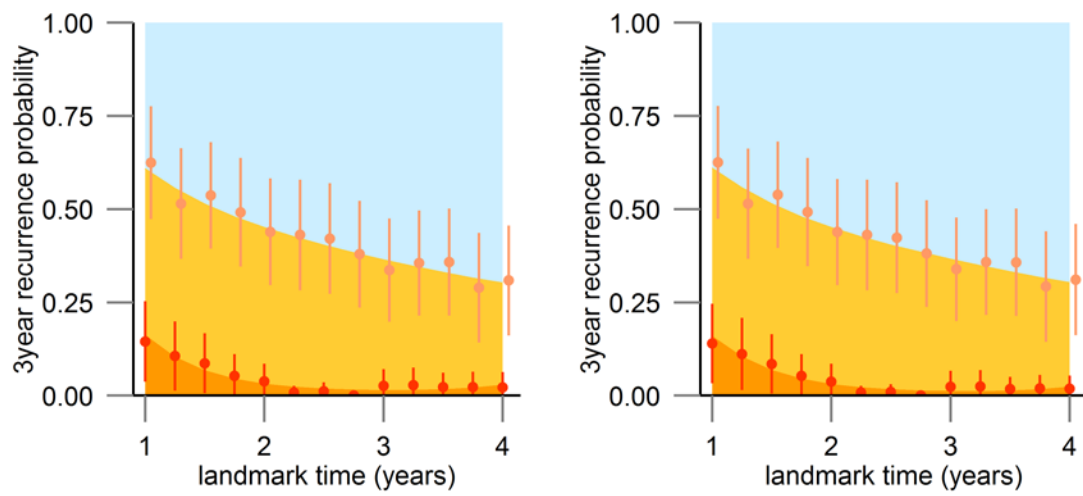

**Recurrence occurred before landmark time, single tumor over 2cm**

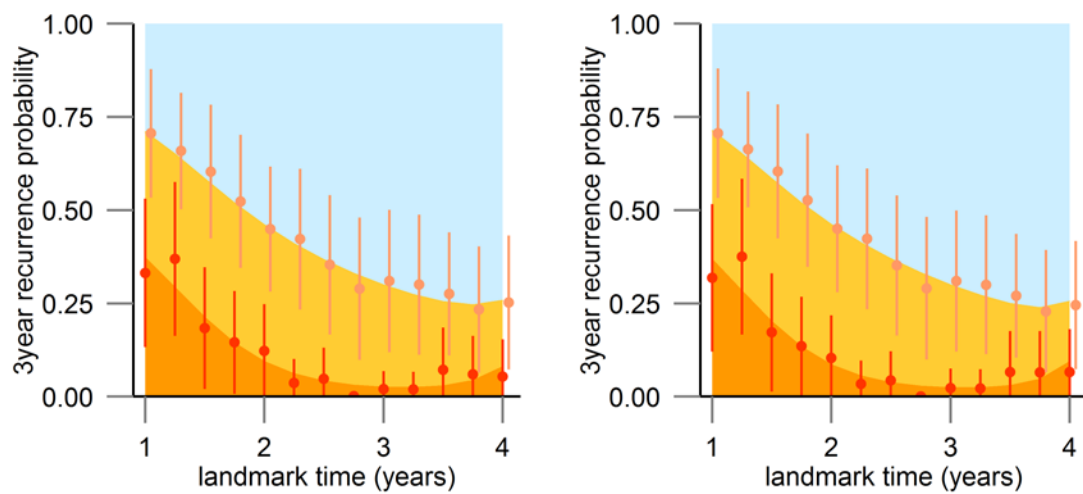

**No recurrence before landmark time, multiple tumors not greater than 2cm**

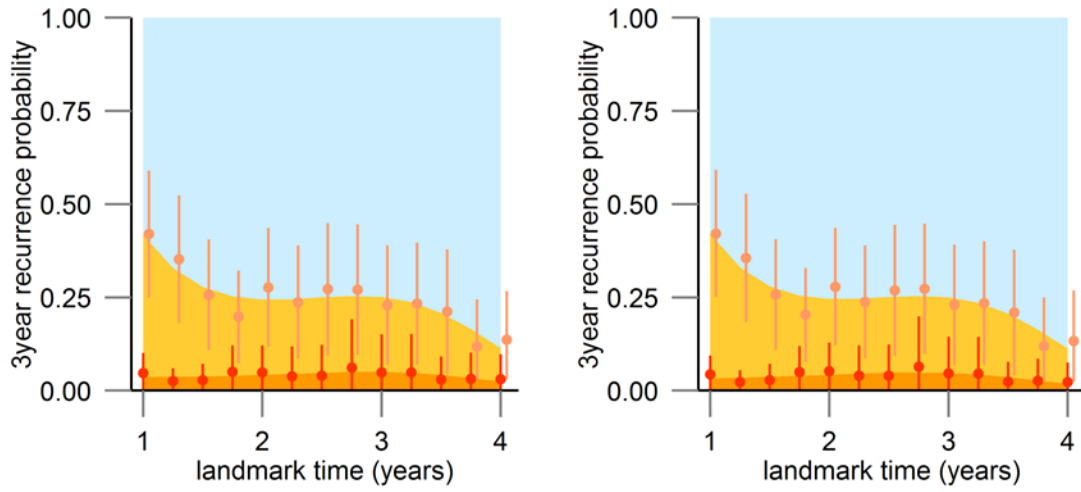

**No recurrence before landmark time, multiple tumors over 2cm**

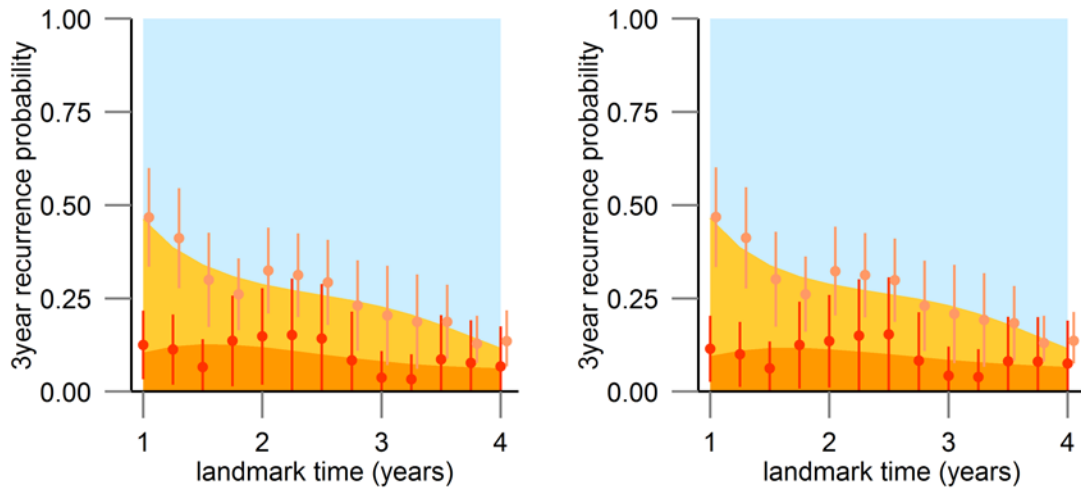

**Recurrence occurred before landmark time, multiple tumors not greater than 2cm**

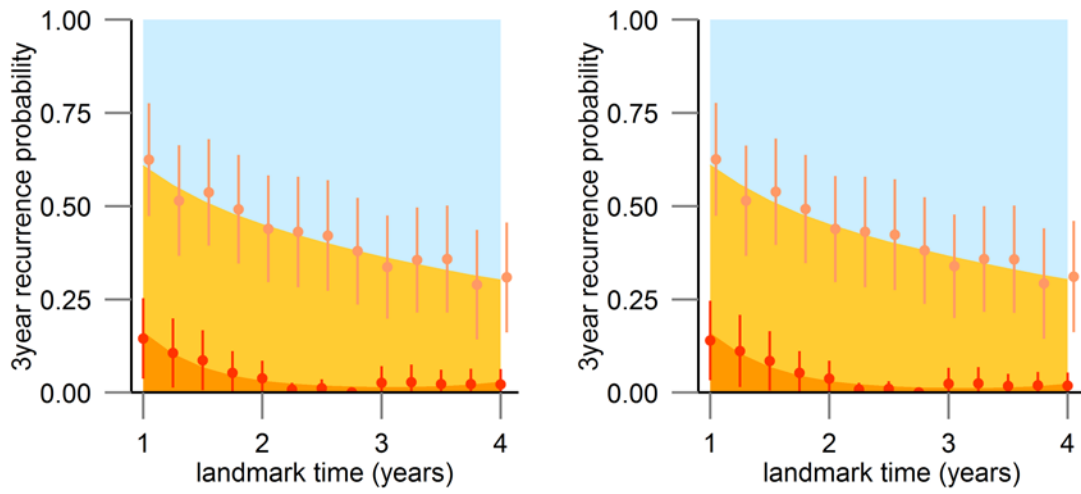

**Recurrence occurred before landmark time, multiple tumors over 2cm**

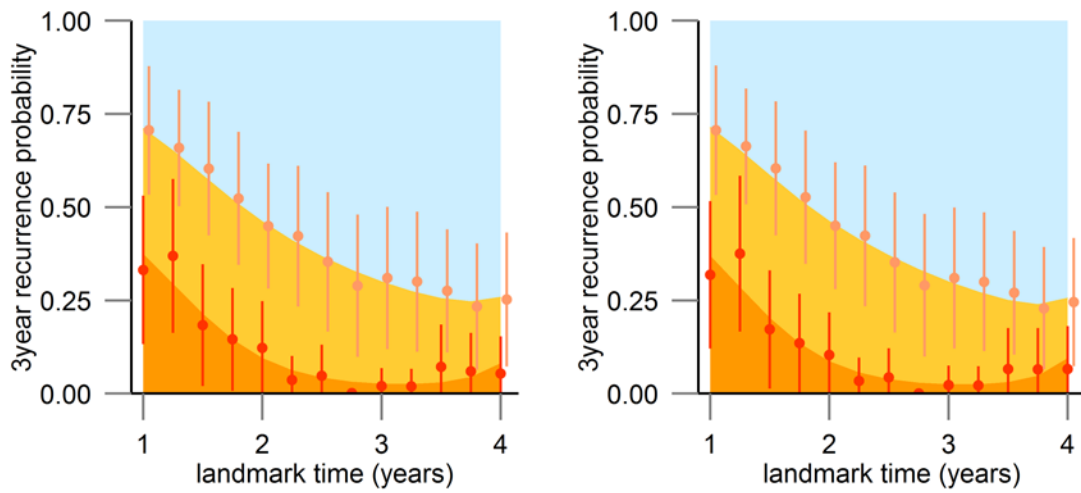

**Table S2. Predict 3-year risks of recurrence regarding death as a terminal event.**  
**(a) Parameter estimates in landmarking supermodel using dynamic pseudo observations (DPOs)**

|                                           | 1 time recurrence |      | 2 or more times recurrences |      | death   |      |
|-------------------------------------------|-------------------|------|-----------------------------|------|---------|------|
|                                           | $\beta$           | se.  | $\beta$                     | se.  | $\beta$ | se.  |
| intercept                                 | -1.43             | 2.60 | -5.14                       | 4.20 | -0.78   | 3.47 |
| time (year)                               |                   |      |                             |      |         |      |
| $s$                                       | 2.46              | 4.30 | 2.82                        | 5.98 | -1.84   | 5.10 |
| $s^2$                                     | -1.79             | 2.21 | -1.38                       | 2.55 | 0.79    | 2.17 |
| $s^3$                                     | 0.25              | 0.33 | 0.16                        | 0.32 | -0.11   | 0.28 |
| the number of recurrences (1 or more / 0) |                   |      |                             |      |         |      |
| intercept                                 | 1.77              | 2.68 | 4.80                        | 4.50 | 2.60    | 2.90 |
| $s$                                       | -3.06             | 4.19 | -3.72                       | 6.48 | -1.52   | 4.25 |
| $s^2$                                     | 1.84              | 2.05 | 0.90                        | 2.71 | 0.60    | 1.83 |
| $s^3$                                     | -0.25             | 0.3  | -0.03                       | 0.34 | -0.09   | 0.24 |
| multiple tumors / single tumor            |                   |      |                             |      |         |      |
| intercept                                 | 3.71              | 2.33 | 0.04                        | 4.65 | 2.34    | 2.60 |
| $s$                                       | -7.06             | 3.59 | 0.28                        | 6.99 | -4.26   | 3.99 |
| $s^2$                                     | 3.70              | 1.67 | 0.27                        | 2.96 | 1.96    | 1.83 |
| $s^3$                                     | -0.53             | 0.23 | -0.05                       | 0.37 | -0.24   | 0.25 |
| the length of tumor (>2cm / ≤2cm)         |                   |      |                             |      |         |      |
| intercept                                 | -0.5              | 2.17 | 1.29                        | 4.08 | -0.33   | 3.00 |
| $s$                                       | 0.83              | 3.31 | -0.37                       | 6.12 | 2.65    | 4.39 |
| $s^2$                                     | -0.47             | 1.52 | -0.08                       | 2.62 | -1.63   | 1.89 |
| $s^3$                                     | 0.07              | 0.21 | 0.04                        | 0.33 | 0.25    | 0.25 |

$\beta$ : parameter estimates; se.: robust standard error;  $s$ :smoothers in the super model.

**(b) Predicted 3-year risks of recurrence and death**

Stacked graphs are drawn the predicted risks of no recurrence for 3years after landmark time (blue), 1 time recurrence (yellow), 2 or more times recurrence (orange) and death (purple). Circle and error bars show point estimates and 95% CI, respectively, by fixed landmark regression model. Filled areas show point estimates by supermodel.

**No recurrence before landmark time, single tumor**

**Tumor not greater than 2cm**

**Tumor over 2cm**

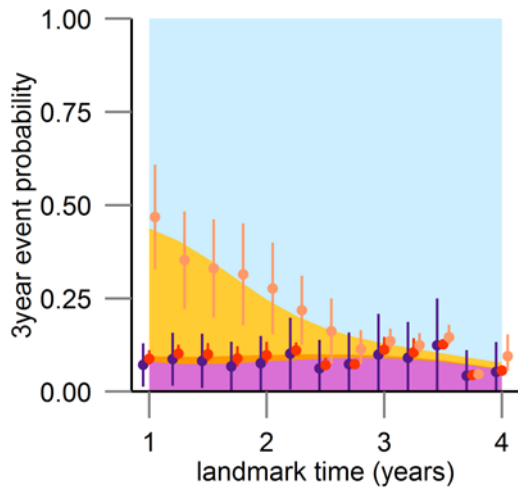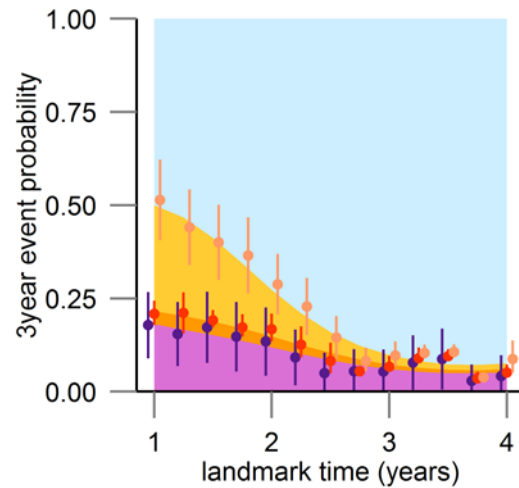

**No recurrence before landmark time, multiple tumors**

**Tumors not greater than 2cm**

**Tumors over 2cm**

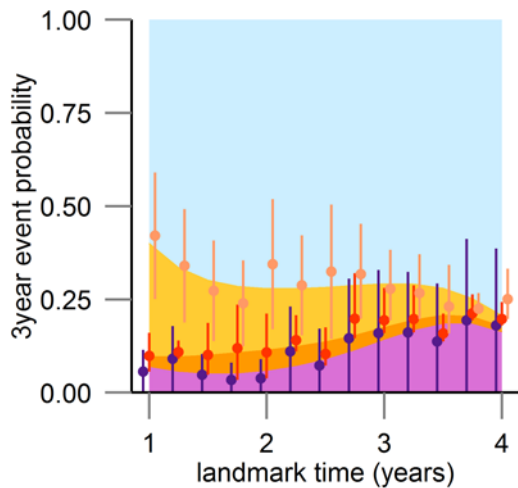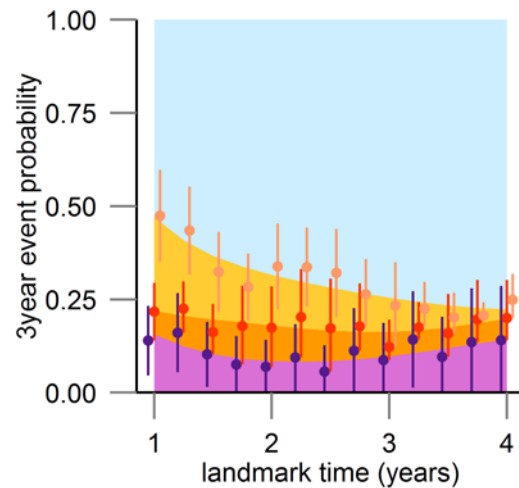

**Recurrence occurred before landmark time, single tumor**  
**Tumor not greater than 2cm      Tumor over 2cm**

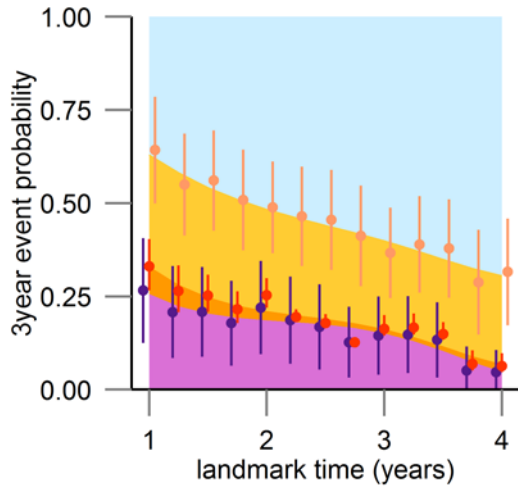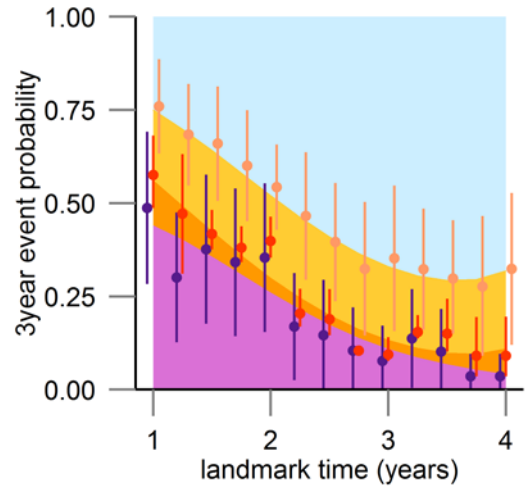

**Recurrence occurred before landmark time, multiple tumors**  
**Tumors not greater than 2cm      Tumors over 2cm**

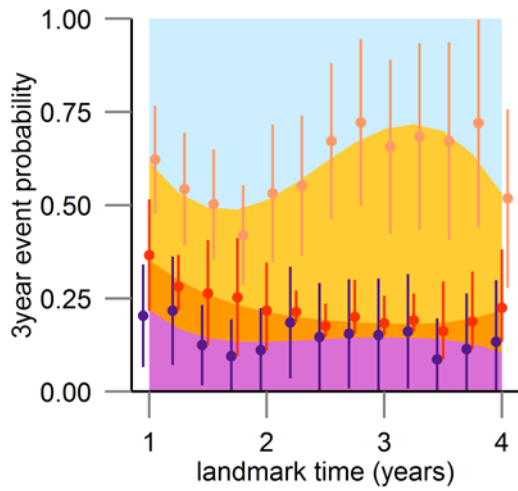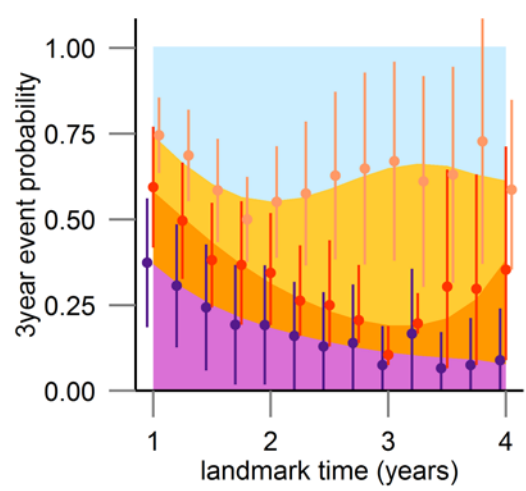

Supplement: MOESM2 [file 16481264]
