# Supplementary material for: Dynamic prediction of repeated events data based on landmarking model: application to colorectal liver metastases data
Source: Springer Nature journal article supplement (doi:10.1186/s12874-019-0677-0), 2019-02-14
Supplement: MOESM1 [file 16481264]

## Appendix: Product-integral

Let  $\lambda_{qr}(t)$  be the discrete hazard (intensity) function from state  $q$  to state  $r$  at time  $t$ , then, a nonparametric maximum likelihood estimator of  $\lambda_{qr}(t)$  is calculated as  $N_{qr}(t)/Y_q(t)$ , where  $N_{qr}(t)$  is the transition number from state  $q$  to state  $r$  and  $Y_q(t)$  is the number of at risks in state  $q$ . The transition probability matrix  $\mathbf{P}(t_0, t) = [P_{qr}(t_0, t)]$  can be estimated using a transition hazard matrix  $\hat{\boldsymbol{\lambda}}(t) = [\hat{\lambda}_{qr}(t)]$  with  $\hat{\lambda}_{qq}(t) = -\sum_{r:r \neq q} \hat{\lambda}_{qr}(t)$  as follows:

$$\hat{\mathbf{P}}(t_0, t) = \prod_{u:u \in (t_0, t]} \{\mathbf{1} + \hat{\boldsymbol{\lambda}}(u)\}$$

where  $\prod$  is product integral and  $\mathbf{1}$  is the identity matrix.
